# Supplementary material for: Inflammatory Bowel Disease Guidelines for Corneal Refractive Surgery Evaluation
Source: MDPI journal article supplement (doi:10.3390/jcm11164861), 2022-08-19
Supplement: s1 [file s1]

Table S1: Preoperative and Postoperative Measurements

| Patient | Eye | Procedure                                   | Preop K1     | Preop K2     | Preop Pachymetry | Ablation Depth         | Residual Stromal Thickness | Preop UDVA | Preop MRx         | Preop BDVA | 1 year UDVA           | 1 year MRx                           | 1 year BDVA        |
|---------|-----|---------------------------------------------|--------------|--------------|------------------|------------------------|----------------------------|------------|-------------------|------------|-----------------------|--------------------------------------|--------------------|
| 1       | OD  | SMILE w Zeiss VisuMax                       | 44.6 D @ 177 | 45.7 D @ 87  | 559 µm           | <sup>a</sup> 107/15 µm | 335 µm                     | CF         | -5.50             | 20/20      | <sup>b</sup> 20/20-1  | <sup>b</sup> +0.50 Sphere            | <sup>b</sup> 20/20 |
| 1       | OS  | SMILE w Zeiss VisuMax                       | 44.8 D @ 164 | 45.6 D @ 74  | 557 µm           | <sup>a</sup> 96/15 µm  | 343 µm                     | 20/600     | -4.50 -0.25 @ 176 | 20/20      | <sup>b</sup> 20/20-2  | <sup>b</sup> +0.50 -0.50 @005        | <sup>b</sup> 20/20 |
| 2       | OD  | PRK w WaveLight EX500                       | 42.3 D @ 70  | 43.6 D @ 160 | 547 µm           | 52 µm                  | 440 µm                     | 20/250     | -2.00 -1.50 @ 081 | 20/20      | 20/20                 | .025 Sphere                          | 20/20              |
| 2       | OS  | PRK w WaveLight EX500                       | 42.7 D @ 105 | 43.5 D @ 15  | 539 µm           | 72 µm                  | 415 µm                     | 20/500     | -4.00 -1.25 @ 090 | 20/20      | 20/20                 | Plano -0.50 @180                     | 20/20              |
| 3       | OD  | LASIK w WaveLight EX500 and Zeiss VisuMax   | 42.9 D @ 2   | 44.3 D @ 92  | 538 µm           | 33 µm                  | 399 µm                     | 20/150     | -1.75 -0.75 @ 175 | 20/20      | <sup>c</sup> 20/15    | <sup>c</sup> +0.25 Sphere            | <sup>c</sup> 20/20 |
| 4       | OD  | LASIK w WaveLight EX500 and Zeiss VisuMax   | 44.9 D @ 85  | 45.5 D @ 175 | 532 µm           | 47 µm                  | 382 µm                     | 20/500     | -2.50 -0.75 @ 095 | 20/20      | 20/20-1               | Plano -0.50 @176                     | 20/20              |
| 4       | OS  | LASIK w WaveLight EX500 and Zeiss VisuMax   | 44.6 D @ 75  | 45.6 D @ 165 | 544 µm           | 37 µm                  | 402 µm                     | 20/200     | -1.50 -1.25 @ 074 | 20/20-1    | 20/25-1               | -0.25 -0.25 @013                     | 20/20              |
| 5       | OD  | LASIK w WaveLight EX500 and Zeiss VisuMax   | 43.5 D @ 10  | 44.6 D @ 100 | 570 µm           | 49 µm                  | 420 µm                     | 20/250     | -2.50 -0.25 @ 005 | 20/20      | 20/20                 | Plano Sphere                         | 20/20              |
| 5       | OS  | LASIK w WaveLight EX500 and Zeiss VisuMax   | 43.6 D @ 168 | 44.5 D @ 78  | 569 µm           | 42 µm                  | 416 µm                     | 20/400     | -2.50 -0.50 @ 012 | 20/20      | 20/20                 | +0.25 Sphere                         | 20/20              |
| 6       | OD  | LASIK w WaveLight EX500 and Zeiss VisuMax   | 42.7 D @ 24  | 43.3 D @ 114 | 535 µm           | 56 µm                  | 375 µm                     | 20/300     | -3.25 -0.50 @ 069 | 20/20      | 20/15                 | +0.25 Sphere                         | 20/15              |
| 6       | OS  | LASIK w WaveLight EX500 and Zeiss VisuMax   | 42.6 D @ 149 | 44.4 D @ 59  | 539 µm           | 68 µm                  | 368 µm                     | 20/300     | -3.25 -1.25 @139  | 20/20      | 20/20                 | Plano -0.75 @160                     | 20/20 + 3          |
| 7       | OD  | LASIK w WaveLight EX500 and WaveLight FS200 | 44.8 D @ 175 | 45.7 D @ 85  | 551 µm           | 78 µm                  | 366 µm                     | 20/250     | -5.00 -0.25 @135  | 20/20      | 20/20                 | Plano Sphere                         | 20/20              |
| 7       | OS  | LASIK w WaveLight EX500 and WaveLight FS200 | 45.1 D @ 5   | 46.0 D @ 95  | 552 µm           | 88 µm                  | 364 µm                     | 20/500     | -5.50 sph         | 20/20      | 20/20-1               | PL -0.25 @ 165                       | 20/20-1            |
| 8       | OD  | LASIK w WaveLight EX500 and WaveLight FS200 | 45.4 D @ 134 | 45.6 D @ 44  | 612 µm           | 50 µm                  | 455 µm                     | 20/400     | -3.00 -0.75 @ 106 | 20/20      | <sup>b</sup> 20/20    | <sup>b</sup> +0.25 Sphere            | <sup>b</sup> 20/20 |
| 8       | OS  | LASIK w WaveLight EX500 and WaveLight FS200 | 45.3 D @ 148 | 45.4 D @ 58  | 523 µm           | 28 µm                  | 392 µm                     | 20/250     | -2.75 -0.50 @ 084 | 20/20      | <sup>b, d</sup> 20/70 | <sup>b, d, e</sup> -1.25 -0.50 @ 002 | <sup>b</sup> 20/20 |
| 9       | OD  | LASIK w WaveLight EX500 and Zeiss VisuMax   | 44.7 D @ 170 | 46.0 D @ 80  | 561 µm           | 44 µm                  | 403 µm                     | 20/400     | -2.75 Sphere      | 20/20      | 20/25-1               | +0.75 - 0.25@118                     | 20/20              |
| 9       | OS  | LASIK w WaveLight EX500 and Zeiss VisuMax   | 44.5 D @ 9   | 45.3 D @ 99  | 555 µm           | 44 µm                  | 397 µm                     | 20/500     | -2.75 Sphere      | 20/20      | 20/20-1               | Plano - 0.50@66                      | 20/20              |
| 10      | OD  | LASIK w WaveLight EX500 and Zeiss VisuMax   | 45.2 D @169  | 46.0 D @ 79  | 534 µm           | 45 µm                  | 388 µm                     | 20/125     | -3.00 Sphere      | 20/20      | 20/15-1               | Plano Sphere                         | 20/15              |
| 10      | OS  | LASIK w WaveLight EX500 and Zeiss VisuMax   | 45.6 D @ 6   | 46.6 D @ 96  | 540 µm           | 30 µm                  | 405 µm                     | 20/200     | -2.00 Sphere      | 20/20      | 20/15                 | Plano Sphere                         | 20/15              |
| 11      | OD  | LASIK w WaveLight EX500 and Zeiss VisuMax   | 44.7 @ 174   | 45.6 @ 84    | 534 µm           | 69 µm                  | 359 µm                     | 20/500     | -4.75 -0.25 @ 090 | 20/20      | <sup>e</sup> 20/25+   | <sup>f</sup> N/A                     | <sup>f</sup> N/A   |
| 11      | OS  | LASIK w WaveLight EX500 and Zeiss VisuMax   | 44.6 D @ 18  | 45.6 D @ 108 | 530 µm           | 66 µm                  | 359 µm                     | 20/500     | -4.50 -0.25 @ 045 | 20/20      | <sup>e</sup> 20/20+   | <sup>f</sup> N/A                     | <sup>f</sup> N/A   |

UDVA: Uncorrected Distance Visual Acuity; MRx: Manifest Refraction; BDVA: Best Corrected Distance Visual Acuity; OD: Right Eye; OS: Left Eye

<sup>a</sup>Removed lenticule thickness at center/periphery; <sup>b</sup>3.5 months follow-up value; <sup>c</sup>4 months follow-up value; <sup>d</sup>Eye was corrected for monovision: target -1.25 Sphere; <sup>e</sup>1 week follow-up value; <sup>f</sup>Not available due to no data secondary to short follow-up
